# Supplementary material for: Biomass Smoke Exposure Enhances Rhinovirus-Induced Inflammation in Primary Lung Fibroblasts
Source: MDPI journal article supplement (doi:10.3390/ijms17091403), 2016-08-25
Supplement: s1 [file s1]

## Supplementary Materials: Biomass Smoke Exposure Enhances Rhinovirus-Induced Inflammation in Primary Lung Fibroblasts

Sarah J. Capistrano, Razia Zakarya, Hui Chen and Brian G. Oliver

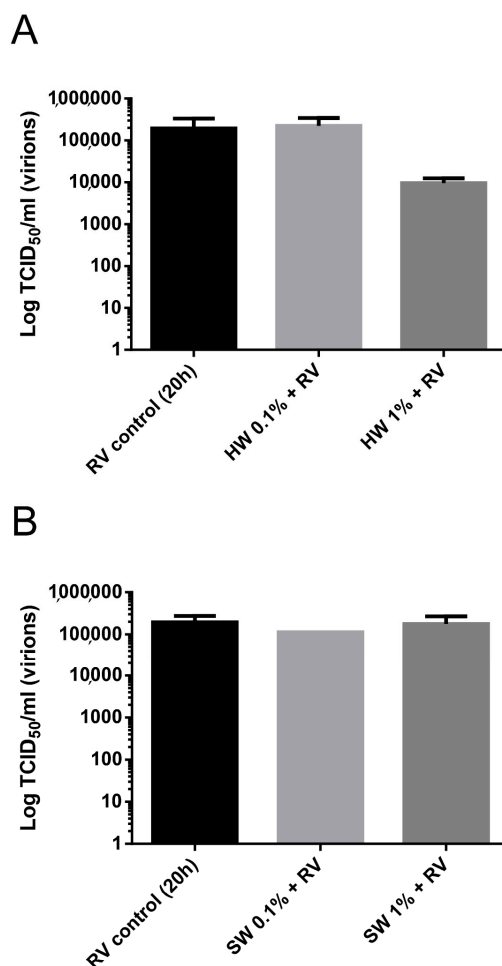

**Figure S1.** Measurement of viral load from RV-16 infected primary human lung fibroblasts stimulated with Hardwood (A) and Softwood (B) smoke extract. Fibroblasts were infected with RV-16 and either exposed to hardwood smoke extract (0.1%, 1%) or no exposure for 24 h. Cell free supernatants were collected and viral load was measured via viral titration assay. Data presented as mean  $\pm$  SEM. Statistical analysis executed using One-way ANOVA with Tukey's post-test. No-significant differences were found,  $n = 3$ .
